# Supplementary material for: Fine tuning of metal-specific activity in the Mn-like group of cambialistic superoxide dismutases
Source: Royal Society of Chemistry journal article supplement (doi:10.1039/c5ra13559a), 2015-01-01
Supplement: c5ra13559a1.pdf [file c5ra13559a1.pdf]

## Supplementary material

**Table S1** X-ray diffraction data-collection and processing statistics

|                                                   | <b>StSOD<br/>4YIO</b>     | <b>SmSOD<br/>4YIP</b>    |
|---------------------------------------------------|---------------------------|--------------------------|
| Space group                                       | C222 <sub>1</sub>         | P2 <sub>1</sub>          |
| a (Å)                                             | 98.52                     | 67.96                    |
| b (Å)                                             | 100.23                    | 82.88                    |
| c (Å)                                             | 118.12                    | 72.78                    |
| $\alpha$ (°)                                      | 90.00                     | 90.00                    |
| $\beta$ (°)                                       | 90.00                     | 94.24                    |
| $\gamma$ (°)                                      | 90.00                     | 90.00                    |
| Resolution limits (Å)                             | 70.0 –1.60<br>(1.68-1.60) | 50.0-2.15<br>(2.23-2.15) |
| No. of observations                               | 289970                    | 246773                   |
| No. of unique reflection                          | 81739                     | 43458                    |
| Completeness (%)                                  | 97.1 (88.4)               | 99.7 (99.7)              |
| I/ $\sigma$ (I)                                   | 10.8 (2.9)                | 8.4 (2.6)                |
| Average multiplicity                              | 4.0                       | 5.7                      |
| Rmerge (%)                                        | 4.7 (31.6)                | 13.5 (64.7)              |
| Mosaicity                                         | 0.4                       | 0.6                      |
| V <sub>M</sub> (Å <sup>3</sup> Da <sup>-1</sup> ) | 3.13                      | 2.38                     |
| Solvent content (%)                               | 60.7                      | 48.3                     |

**Table S2** Summary of refinement statistics

|                                                 | <b>StSOD<br/>4YIO</b> | <b>SmSOD<br/>4YIP</b> |
|-------------------------------------------------|-----------------------|-----------------------|
| Resolution limits (Å)                           | 27.89-1.60            | 31.39-2.15            |
| Number of reflections used<br>in the refinement | 69916                 | 41189                 |
| No. of reflections in working set               | 66175                 | 39008                 |
| No. of reflections in test set                  | 3741                  | 2181                  |
| R/R <sub>free</sub>                             | 0.156/0.175           | 0.193/0.259           |
| No. of protein atoms                            | 3256                  | 6417                  |
| No. of ion and ligand atoms                     | 74                    | 4                     |
| No. of water molecules                          | 561                   | 278                   |
| <b>RMSD from ideal values</b>                   |                       |                       |
| Bond lengths (Å)                                | 0.027                 | 0.015                 |
| Bond angles (°)                                 | 2.41                  | 1.718                 |
| <b>Average B-factors (Å<sup>2</sup>)</b>        |                       |                       |
| All atoms                                       | 23.0                  | 32.0                  |
| Protein main chains                             | 19.2                  | 31.4                  |
| Protein side chains                             | 22.8                  | 33.3                  |
| Solvent atoms                                   | 33.8                  | 33.0                  |
| Ion and ligand atoms                            | 38.1                  | 34.1                  |
| <b>Ramachandran plot statistics</b>             |                       |                       |
| Residues in the most favoured regions (%)       | 97                    | 95                    |
| Residues in the allowed regions (%)             | 12                    | 5                     |
| Residues in the forbidden regions (%)           | 0                     | 0                     |
